# Supplementary material
Source: Elsevier journal article supplement (https://www.sciencedirect.com/science/article/pii/S0025775321003936)
Supplement: mmc1 [file S0025775321003936:mmc1.doc]

**Tabla 1 anexo. Conocimientos hipertensión y riesgos. Resultados 1ª visita antes/ despues, 2ª visita antes/despues y 3ª visita antes/despues en el GIC y GII**

| Hipertensión | 1a visita antes  intervención  n (%) | | | 1a visita después  intervención  n (%) | 2a visita antes  intervención  n (%) | | 2a visita después  intervención  n (%) | | | 3a visita antes  intervención  n (%) | | 3a visita despues  intervención  n (%) |
| --- | --- | --- | --- | --- | --- | --- | --- | --- | --- | --- | --- | --- |
| ¿A partir de qué valor se considera una persona hipertensa? | **GIC** Valor correcto (140/90)  211 (43%)  **GII** Valor correcto (140/90)  204 (41,6%) | | | Valor correcto≠  485 (99%)  Valor correcto≠  476 (97,1%) | Valor correcto≠  334 (68,2%)  Valor correcto≠  382 (78%) | | Valor correcto≠  469 (99,6%)  No intervención | | | Valor correcto*≠  386 (83,2%)  Valor correcto*  248 (52,9%) | | Valor correcto≠  462 (100%)  No intervención |
| ¿Es la hipertensión una enfermedad para tota la vida? | **GIC**  SÍ  317 (64,7%)  **GII**  SÍ  314 (64%) | | | SÍ≠  484 (98,8%)  SÍ≠  485 (99%) | SÍ≠  414 (87,5%)  SÍ≠  430 (90,5%) | | SÍ≠  471 (100%)  No intervención | | | SÍ*≠  437 (94,2%)  SÍ*≠  367 (78,3%) | | SÍ ≠  462 (100%)  No intervención |
| ¿Le han explicado qué es la hipertensión? | **GIC**  SÍ  277 (56,5%)  **GII** SÍ  295 (60%) | | | SÍ  482 (98,4%)  SÍ  485 (99%) | SÍ  456 (96,4%)  SÍ  459 (96,6%) | | SÍ≠  471 (100%)  No intervención | | | SÍ  459 (98,9%)  SÍ  451 (96,2%) | | SÍ  462 (100%)  No intervención |
| Riesgos de la hipertensión | | |  | | |  | |  | | |  |  |
| ¿Tener la presión arterial elevada puede producir problemas en los ojos? | | **GIC**  SI  286 (58%)    **GII**  SI  273 (55,7%) | SI≠  489 (99,8%)    SI≠  490 (100%) | | | SI≠  409 (83,5%)  SI≠  414 (87,2%) | | SI≠  470 (99,8%)  No intervención | | | SI*≠  440 (94,8%)  SI*≠  343 (73,1%) | SI≠  462 (100%)  No intervención |
| ¿Tener la presión arterial elevada puede producir problemas en el corazón? | | **GIC**  SI  445 (90,8%)    **GII**  SI  463 (94,5%) | SI  489 (99,8%)    SI  490 (100%) | | | SI  469 (99,2%)  SI  473 (99,6%) | | SI  469 (99,6%)  No intervención | | | SI  462 (99,6%)  SI  464 (98,9%) | SI  464 (100%)  No intervención |
| ¿Tener la presión arterial elevada puede producir problemas en el celebro? | | **GIC**  SI  347 (70,8%)    **GII**  SI  360(73,5%) | SI≠  488 (99,6%)    SI≠  487 (99,4%) | | | SI≠  429 (90,7%)  SI 93,9%≠  (n=446) | | SI≠  471 (100%)  No intervención | | | SI*≠  449 (96,8%)  SI*≠  402 (85,7%) | SI≠  462 (100%)  No intervención |
| ¿Tener la presión arterial elevada puede producir problemas en los riñones? | | **GIC**  SI  233 (47,6%)    **GII**  SI  243 (49,4%) | SI≠  486 (99,2%)    SI≠  487 (99,4%) | | | SI≠  378 (79,9%)  SI≠  392 (82,5%) | | SI≠  471 (100%)  No intervención | | | SI*≠  424 (91,4%)  SI*≠  335 (71,4%) | SI≠  460 (99,6%)  No intervención |
| Factores de riesgo asociados a la hipertensión | |  |  | | |  | |  |  | |  |  | |
| Un hipertenso con diabetes ¿tiene más riesgo de sufrir una enfermedad del corazón? | | **GIC**  SÍ  346 (70,6%)  **GII**  SÍ  353 (72%) | SI  483 (98,6%)      SI  484 (98,8%) | | | SI≠  419 (88,6%)  SI  431 (90,7%) | |  | SI≠  473 (100%)  No intervención | | SI*  439 (94,6%)  SI*  388 (82,7%) | SI  463 (99,8%)  No intervención | |
| Un hipertenso con obesidad ¿tiene más riesgo de sufrir una enfermedad del corazón? | | **GIC**  SÍ  456 (93,1%)  **GII**  SÍ  464 (94,7%) | SI  489 (99,8%)    SI  489 (99,8%) | | | SI  473 (99,4%)  SI  471 (99,2%) | |  | SI  473 (100%)  No intervención | | SI  463 (99,8%)  SI  462 (98,5%) | SI  464 (100%)  No intervención | |
| Un hipertenso fumador ¿tiene más riesgo de sufrir una enfermedad del corazón? | | **GIC**  SÍ  463 (94,5%)  **GII**  SÍ  463 (94,5%) | SI  489 (99,8%)    SI  490 (100%) | | | SI  470 (99,4 %)  SI  473 (99,6%) | |  | SI  473 (100%)  No intervención | | SI  461 (99,4%)  SI  466 (99,4%) | SI  464 (100%)  No intervención | |
| Un hipertenso con colesterol alto ¿tiene más riesgo de sufrir una enfermedad del corazón? | | **GIC**  SÍ  426 (86,9%)  **GII**  SÍ  422 (86,1%) | SI  490 (100%)    SI  488 (99,6%) | | | SI  460 (97,3%)  SI  471 (99,2%) | |  | SI  473 (100%)  No intervención | | SI  461 (99,4%)  SI  460 (98,1%) | SI  464 (100%)  No intervención | |

*Diferencias estadísticamente significativas entre el GIC i el GII (p< 0,001)

≠Diferencias estadísticamente significativas entre intervenciones educativas y visita (p< 0,001)
