# Supplementary material
Source: Elsevier journal article supplement (https://www.sciencedirect.com/science/article/pii/S0025775321003936)
Supplement: mmc2 [file S0025775321003936:mmc2.doc]

**Tabla 2 anexo.**

**Conocimientos dieta y modificaciones estilos de vida. Resultados 1ª visita antes/ despues, 2ª visita antes/despues y 3ª visita antes/despues en el GIC y GII**

| Dieta | 1a visita antes  intervención  n (%) | | | 1a visita después  intervención  n (%) | 2a visita antes  intervención  n (%) | | 2a visita después  intervención  n (%) | | 3a visita antes  intervención  n (%) | | 3a visita después  intervención  n (%) |
| --- | --- | --- | --- | --- | --- | --- | --- | --- | --- | --- | --- |
| ¿Cree que es importante la dieta para el hipertenso? | **GIC**  SÍ  476 (97,1%)  **GII**  SÍ  474 (96,7%) | | | SI  489 (99,8%)    SI  490 (100%) | SI  465 (98,3%)  SI  475 (100%) | | SI  471 (100%)  No intervención | | SI  463 (99,8%)  SI  468 (99,8%) | | SI  464 (100%)  No intervención |
| Una dieta pobre en grasas, abundante en frutas y verduras ¿es importante para disminuir la presión arterial? | **GIC**  SÍ  415 (84,7%)  **GII**  SÍ  402 (82%) | | | SI  490 (100%)    SI  490 (100%) | SI  464 (98,1%)  SI  470 (98,9%) | | SI  471 (100%)  No intervención | | SI  462 (99,6%)  SI  459 (97,9%) | | SI  464 (100%)  No intervención |
| ¿Es aconsejable reducir el consumo de sal? | **GIC**  SÍ  483 (98,6%)  **GII**  SÍ  481 (98,2%) | | | SI  490 (100%)    SI  490 (100%) | SI  473 (100%)  SI  474 (99,8%) | | SI  471 (100%)  No intervención | | SI  463 (99,8%)  SI  470 (100%) | | SI  464 (100%)  No intervención |
| Modificaciones estilos de vida | | |  | | |  | |  | |  |  |
| ¿Cree que perder peso en personas obesas puede ayudar a bajar la presión arterial? | | **GIC**  SI  449 (91,6%)  **GII**  SI  448 (91,4%) | SI  490 (100%)    SI  490 (100%) | | | SI  469 (99,2%)  SI  473 (99,6%) | | SI  471 (100%)  No intervención | | SI  463 (99,8%)  SI  461 (98,3%) | SI  464 (100%)  No intervención |
| ¿Cree que caminar cada día ½ -1h, puede reducir el riesgo de sufrir una enfermedad del corazón? | | **GIC**  SI  465 (94,98%)    **GII**  SI  460 (93,9%) | SI  490 (100%)    SI  490 (100%) | | | SI  469 (99,2%)  SI  473 (99,6%) | | SI  471 (100%)  No intervención | | SI  462 (99,6%)  SI  465 (99,1%) | SI  464 (100%)  No intervención |
| ¿Cree que si se toma la vida con tranquilidad puede favorecer el control de la hipertensión? | | **GIC**  SI  447 (91,2%)    **GII**  SI  439 (89,6%) | SI  488 (99,6%)    SI  489 (99,8%) | | | SI  466 (98,5%)  SI  467 (98,3%) | | SI  47 (100%)  No intervención | | SI  456 (98,3%)  SI  457 (97,4%) | SI  464 (100%)  No intervención |
