# Supplementary material
Source: Elsevier journal article supplement (https://www.sciencedirect.com/science/article/pii/S0025775321003936)
Supplement: mmc3 [file S0025775321003936:mmc3.doc]

**Tabla 3 anexo.**

**Conocimientos medicación. Resultados 1ª visita antes/ despues, 2ª visita antes/despues y 3ª visita antes/despues en el GIC y GII**

| Medicación | 1a visita antes  intervención  n (%) | 1a visita después  intervención  n (%) | 2a visita antes  intervención  n (%) | 2a visita después  intervención  n (%) | 3a visita antes  intervención  n (%) | 3a visita después  intervención  n (%) |
| --- | --- | --- | --- | --- | --- | --- |
| ¿Cree que se puede controlar la hipertensión sólo con medicación? | **GIC** NO  237 (48,4%)  **GII**  NO  265 (54,1%) | NO≠  479 (97,8%)    NO≠  486 (99,2%) | NO≠  369 (78%)  NO≠  385 (81,1%) | NO≠  460 (97,7%)  No intervención | NO*≠  409 (88,1%)  NO*≠  279 (59,5%) | NO≠  459 (99,4%)  No intervención |
| ¿Cree que Ud. puede aumentar o disminuir la dosis de la medicación si le sube o le baja la presión arterial? | **GIC**  NO  350 (71,4%)  **GII**  NO  364 (74,3%) | NO≠  483 (98,6%)    NO≠  486 (99,2%) | NO≠  406 (85,8%)  NO≠  436 (91,8%) | NO≠  467 (99,2%)  No intervención | NO*≠  434 (93,5%)  NO*≠  386 (82,3%) | NO≠  461 (99,8%)  No intervención |
| ¿Cree que Ud. puede dejar el tratamiento cuando tenga la presión arterial controlada? | **GIC**  NO  362 (73,9%)  **GII**  NO  378 (77,1%) | NO≠  487 (99,4%)    NO≠  488 (99,6%) | NO≠  435 (92%)  NO≠  453 (95,4%) | NO≠  469 (99,6%)  No intervención | NO*≠  451 (97,2%)  NO*≠  417 (88,9%) | NO≠  460 (99,6%)  No intervención |

*Diferencias estadísticamente significativas entre el GIC y el GII (*p*< 0,001)

≠Diferencias estadísticamente significativas entre intervenciones educativas yvisitas (*p*< 0,001)
