# Supplementary material
Source: Elsevier journal article supplement (https://www.sciencedirect.com/science/article/pii/S0025775321003936)
Supplement: mmc4 [file S0025775321003936:mmc4.doc]

**Tabla 4 anexo.**

**Número de pacientes y porcentaje según su IMC en la 1ª, 2ª y 3ª visita**

| IMC | 1ª visita  n (%) | 2ª visita  n (%) | 3ªvisita  n (%) |
| --- | --- | --- | --- |
| Porcentaje de pacientes con el IMC por encima del valor normal (25) | **GIC**  428 (87,3%)      **GII**  396 (80,8%) | 394(83,3%)≠  363 (76,4%)≠ | 363 (78,2%)≠  388 (82,6%)≠ |
| Peso normal  (18,5-24,9) | **GIC**  62 (12,7%)      **GII**  94 (19,2%) | 79 (16,7%)  112 (23,6%) | 101 (21,8%)  79 (16,8%) |
| Sobrepeso  (25-29,9) | **GIC**  208 (42,4%)      **GII**  165 (39,8%) | 211 (44,6%)  213 (44,8%) | 227 (48,9%)  200 (42,6%) |
| Obesidad 1  (30-34,9) | **GIC**  155 (31,6%)    **GII**  134 (27,3%) | 136 (28,8%)  107 (22,5%) | 98 (21,1%)  126 (26,8%) |
| Obesidad 2  (35-39,9) | **GIC**  48 (9,8%)    **GII**  53 (10,8%) | 35 (7,4%)  35 (7,4%) | 31 (6,7%)  53 (11,3%) |
| Obesidad 3  >40 | **GIC**  17 (3,5%)    **GII**  14 (2,9%) | 12 (2,5%)  8 (1,7%) | 7 (1,5%)  9 (1,9%) |

≠ Diferencias estadísticamente significativas entre visitas (p <0,001)
