# Supplementary material
Source: Elsevier journal article supplement (https://www.sciencedirect.com/science/article/pii/S0025775321003936)
Supplement: mmc5 [file S0025775321003936:mmc5.doc]

**Tabla 5 anexo. Perímetro abdominal por encima del valor normal en la 1ª, 2ª y 3ª visita**

| Perimetro abdominal | 1ª visita n (%) | 2ª visita n (%) | 3ª visita n (%) |
| --- | --- | --- | --- |
| Pacientes con el perímetro abdominal por encima del valor normal | **GIC**  350 (71,4%)      **GII**  365 (74,49%) | 279(56,9%)≠  279 (56,9%)≠ | 227(46,3%)≠*  337 (68,8 %) |
| Mujeres con el perímetro abdominal mayor de 88 cm | **GIC**  199 (40,61%)      **GII**  218 (44,49%) | 171 (34,9,7%)≠  185 (37,8%)≠ | 145 (29,6%)≠*  200(40,8%) |
| Hombres con el perímetro abdominal mayor de 102 cm | **GIC**  151 (30,8%)      **GII**  147 (30%) | 108 (22%)≠  93 (19%)≠ | 80 (16,3,9%)≠*  137 (28%) |

*Diferencias estadísticamente significativas entre el GIC y el GII (*p*< 0,001)

≠Diferencias estadísticamente significativas entre intervenciones educativas yvisitas (*p*< 0,001)
